# Supplementary material for: Effect of the Nd promoter on precipitated iron-based catalysts for high-temperature Fischer–Tropsch synthesis of light olefins
Source: Royal Society of Chemistry journal article supplement (doi:10.1039/d6ra02950g), 2026-06-01
Supplement: d6ra02950g1.pdf [file d6ra02950g1.pdf]

## Supporting information

### Effect of the Nd promoter on precipitated iron-based catalysts for high-temperature Fischer-Tropsch synthesis of light olefins

Yi Yang <sup>a,b</sup>, Fengping Yu <sup>b</sup>, Delong Ding <sup>b</sup>, Chunliang Ge <sup>b\*</sup>, Biao Chen <sup>b</sup>, Xiaojiong Wu <sup>b</sup>, Yaoji Chen <sup>b</sup>, Hanfeng Lu <sup>a</sup>, Hongfang Ma <sup>c</sup>, Haitao Zhang <sup>c</sup>, Weixin Qian <sup>c</sup>, Weiyong Ying <sup>c</sup>

<sup>a</sup> Innovation Team of Air Pollution Control, Institute of Catalytic Reaction Engineering, State Key Laboratory Breeding Base of Green Chemistry Synthesis Technology, College of Chemical Engineering, Zhejiang University of Technology, Hangzhou 310014, China.

<sup>b</sup> Zhejiang Zheneng Technology & Environment Group Co., Ltd., Hangzhou, 311100, China.

<sup>c</sup> Engineering Research Center of Large Scale Reactor Engineering and Technology, Ministry of Education, State Key Laboratory of Chemical Engineering, School of chemical engineering, East China University of Science and Technology, Shanghai 200237, China.

\* Corresponding Author

Chunliang Ge

E-mail: [gechunliang@zhenergy.com.cn](mailto:gechunliang@zhenergy.com.cn)

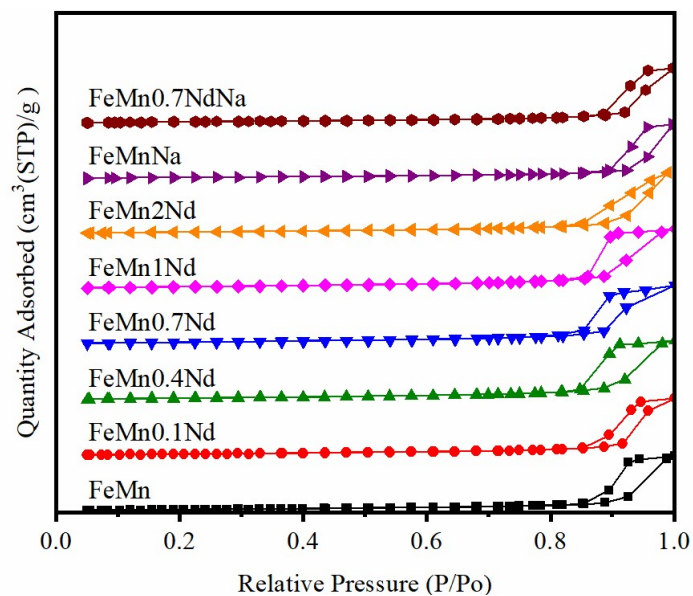

**Fig. S1** Ar-physorption isotherms.

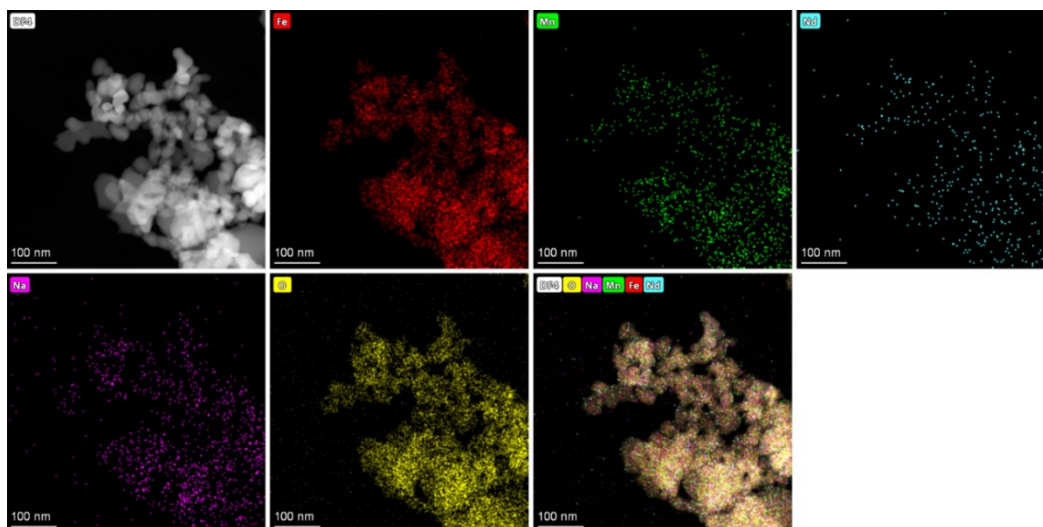

**Fig. S2** EDS-mapping images of fresh FeMn0.7NdNa catalyst.

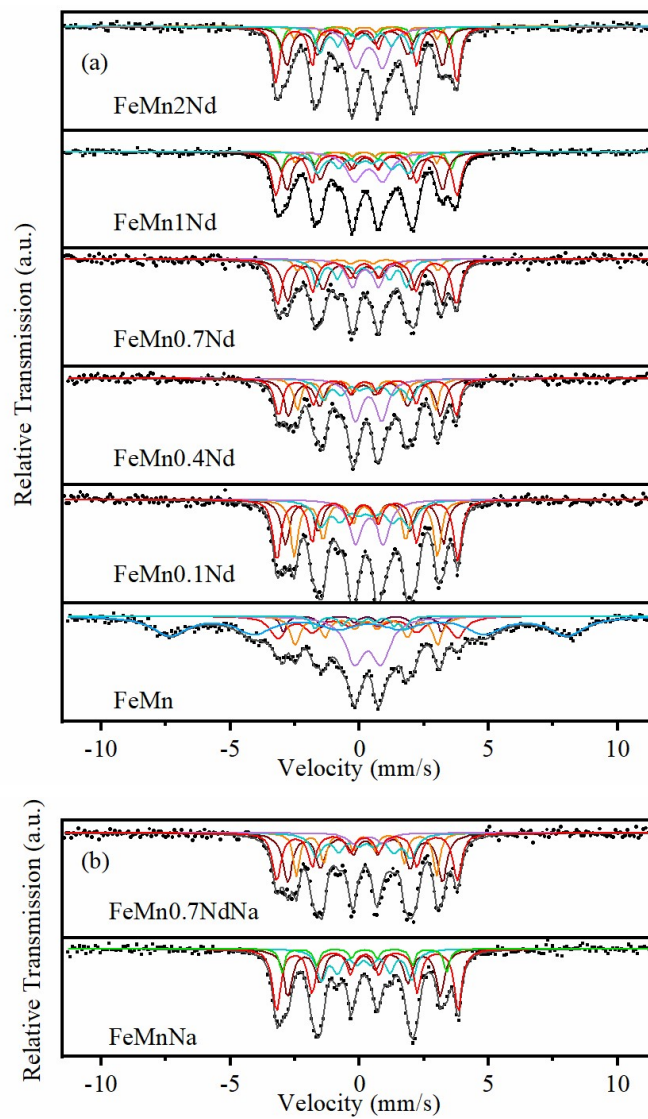

**Fig. S3** Mössbauer spectra of the spent catalysts.

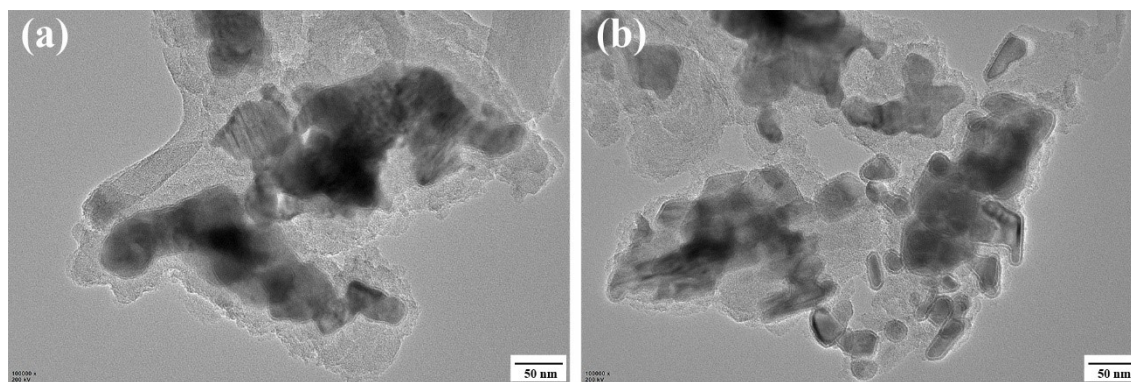

**Fig. S4** TEM images of (a) spent FeMnNa catalyst, (b) spent FeMn0.7NdNa catalyst.

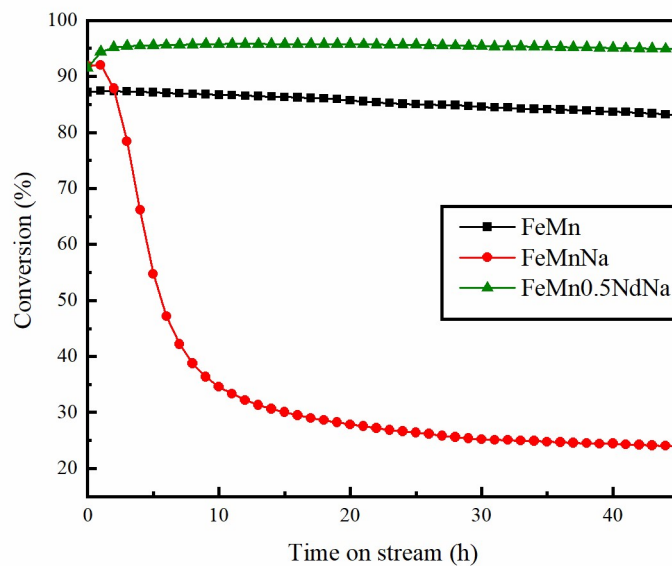

**Fig. S5** CO conversion with the TOS of catalysts.
